# Supplementary material for: Global Identification and Characterization of Transcriptionally Active Regions in the Rice Genome
Source: PLOS journal article supplement (doi:10.1371/journal.pone.0000294), 2007-03-13

A

Non TE Model

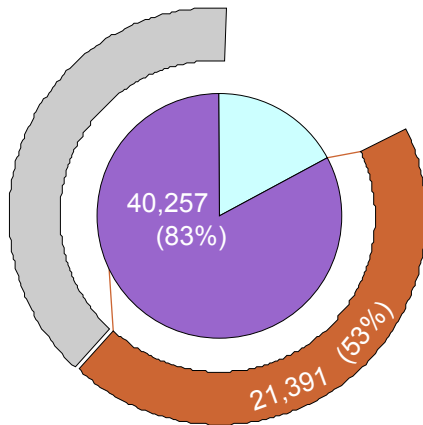

B

PASA Model

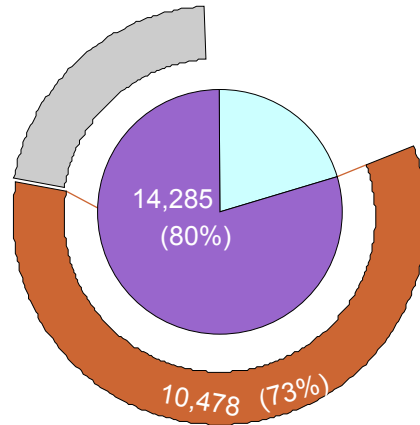

C

TE Model

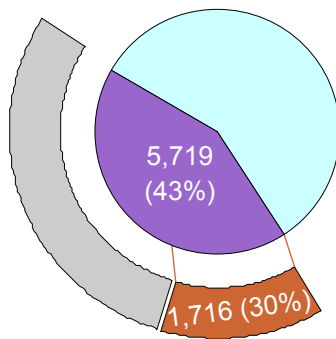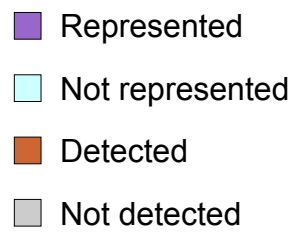

Supplement: S1 (10.1371/journal.pone.0000294.s001) [file journal.pone.0000294.s001]
